# Supplementary material for: Oxidative DNA Damage Signalling in Neural Stem Cells in Alzheimer’s Disease
Source: Hindawi journal article supplement (doi:10.1155/2019/2149812), 2019-11-13

**Figure:**

Asymmetric/symmetric divisions of neural stem cells (NSCs) are regulated by redox-sensitive signalling involving DNA damage response (DDR) pathways. This is crucial for maintaining optimal brain repair/plasticity potential in neurogenic niches. Unsustainable redox signalling may affect the activity of NSCs, and thus adult neurogenesis, contributing to the onset of Alzheimer's disease.

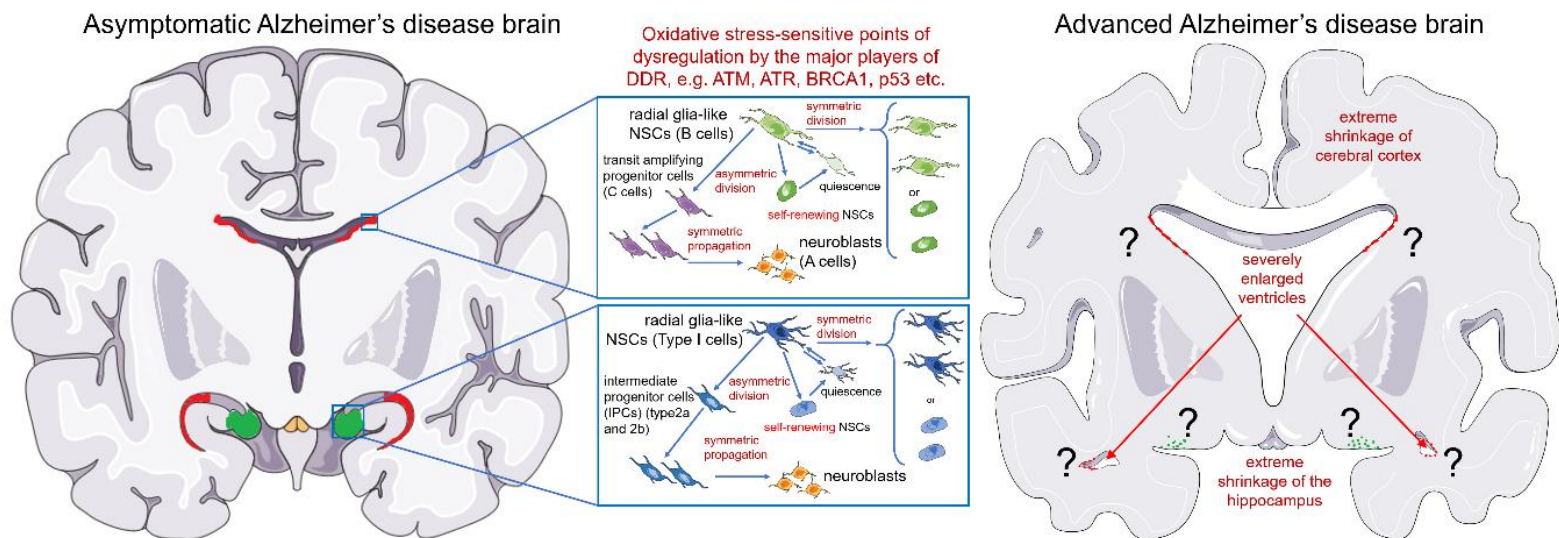

Supplement: f1 [file 2149812.f1.pdf]
